# Supplementary material
Source: publisher site journal article supplement (https://www.dovepress.com/article/428150)
Supplement: Supplementary file 1 [file get_supplementary_file.php]

**Supplementary Table 1** Microarray datasets from the GEO database

| Dataset | Platform | Type |
| --- | --- | --- |
| GSE10950 | Illumina humanRef-8 v2.0 expression beadchip | Expression profiling by array |
| GSE17536 | Affymetrix Human Genome U133 Plus 2.0 Array | Expression profiling by array |
| GSE21510 | Affymetrix Human Genome U133 Plus 2.0 Array | Expression profiling by array |
| GSE41328 | Affymetrix Human Genome U133 Plus 2.0 Array | Expression profiling by array |
| GSE44861 | Affymetrix HT Human Genome U133A Array | Expression profiling by array |
| GSE74602 | Illumina humanRef-8 v2.0 expression beadchip | Expression profiling by array |
| GSE110224 | Affymetrix Human Genome U133 Plus 2.0 Array | Expression profiling by array |

**Supplementary Table 2** Lipid metabolism pathway gene set (https://www.gsea-msigdb.org/gsea/msigdb/human/geneset/REACTOME_METABOLISM_OF_LIPIDS)

| AACS | ARSJ | DGAT2 | HEXB | MOGAT1 | PLA2G12A | SCAP |
| --- | --- | --- | --- | --- | --- | --- |
| ABCA1 | ARSK | DGAT2L6 | HILPDA | MOGAT2 | PLA2G15 | SCD |
| ABCB11 | ARSL | DHCR24 | HMGCL | MOGAT3 | PLA2G1B | SCD5 |
| ABCB4 | ARV1 | DHCR7 | HMGCLL1 | MORC2 | PLA2G2A | SCP2 |
| ABCC1 | ASAH1 | DHRS7B | HMGCR | MSMO1 | PLA2G2D | SEC23A |
| ABCC3 | ASAH2 | DPEP1 | HMGCS1 | MTF1 | PLA2G2E | SEC24A |
| ABCD1 | AWAT1 | DPEP2 | HMGCS2 | MTM1 | PLA2G2F | SEC24B |
| ABHD3 | AWAT2 | DPEP3 | HPGD | MTMR1 | PLA2G3 | SEC24C |
| ABHD4 | B3GALNT1 | EBP | HPGDS | MTMR10 | PLA2G4A | SEC24D |
| ABHD5 | B4GALNT1 | ECHS1 | HSD11B1 | MTMR12 | PLA2G4B | SELENOI |
| ACAA1 | BAAT | ECI1 | HSD11B2 | MTMR14 | PLA2G4C | SERPINA6 |
| ACAA2 | BCHE | ECI2 | HSD17B1 | MTMR2 | PLA2G4D | SGMS1 |
| ACACA | BDH1 | EHHADH | HSD17B11 | MTMR3 | PLA2G4E | SGMS2 |
| ACACB | BDH2 | ELOVL1 | HSD17B12 | MTMR4 | PLA2G4F | SGPL1 |
| ACAD10 | BMX | ELOVL2 | HSD17B13 | MTMR6 | PLA2G5 | SGPP1 |
| ACAD11 | CARM1 | ELOVL3 | HSD17B14 | MTMR7 | PLA2G6 | SGPP2 |
| ACADL | CAV1 | ELOVL4 | HSD17B2 | MTMR8 | PLA2R1 | SIN3A |
| ACADM | CBR1 | ELOVL5 | HSD17B3 | MTMR9 | PLAAT1 | SIN3B |
| ACADS | CBR4 | ELOVL6 | HSD17B4 | MVD | PLAAT2 | SLC10A1 |
| ACADVL | CCNC | ELOVL7 | HSD17B7 | MVK | PLAAT3 | SLC10A2 |
| ACAT1 | CD36 | ENPP6 | HSD17B8 | NCOA1 | PLAAT4 | SLC22A5 |
| ACAT2 | CDIPT | ENPP7 | HSD3B1 | NCOA2 | PLAAT5 | SLC25A1 |
| ACBD4 | CDK19 | EP300 | HSD3B2 | NCOA3 | PLB1 | SLC25A17 |
| ACBD5 | CDK8 | EPHX2 | HSD3B7 | NCOA6 | PLBD1 | SLC25A20 |
| ACBD6 | CDS1 | ESRRA | HTD2 | NCOR1 | PLD1 | SLC27A1 |
| ACBD7 | CDS2 | ESYT1 | IDI1 | NCOR2 | PLD2 | SLC27A2 |
| ACER1 | CEPT1 | ESYT2 | IDI2 | NDUFAB1 | PLD3 | SLC27A3 |
| ACER2 | CERK | ESYT3 | INPP4A | NEU1 | PLD4 | SLC27A5 |
| ACER3 | CERS1 | ETNK1 | INPP4B | NEU2 | PLD6 | SLC44A1 |
| ACHE | CERS2 | ETNK2 | INPP5D | NEU3 | PLEKHA1 | SLC44A2 |
| ACLY | CERS3 | ETNPPL | INPP5E | NEU4 | PLEKHA2 | SLC44A3 |
| ACOT1 | CERS4 | FA2H | INPP5F | NFYA | PLEKHA3 | SLC44A4 |
| ACOT11 | CERS5 | FAAH | INPP5J | NFYB | PLEKHA4 | SLC44A5 |
| ACOT12 | CERS6 | FAAH2 | INPP5K | NFYC | PLEKHA5 | SLC51A |
| ACOT13 | CERT1 | FABP1 | INPPL1 | NPAS2 | PLEKHA6 | SLC51B |
| ACOT2 | CGA | FABP12 | INSIG1 | NR1D1 | PLEKHA8 | SLCO1A2 |
| ACOT4 | CH25H | FABP2 | INSIG2 | NR1H2 | PLIN1 | SLCO1B1 |
| ACOT6 | CHAT | FABP3 | KDSR | NR1H3 | PLIN2 | SLCO1B3 |
| ACOT7 | CHD9 | FABP4 | KPNB1 | NR1H4 | PLIN3 | SMARCD3 |
| ACOT8 | CHKA | FABP5 | LBR | NRF1 | PLPP1 | SMPD1 |
| ACOT9 | CHKB | FABP6 | LCLAT1 | NSDHL | PLPP2 | SMPD2 |
| ACOX1 | CHPT1 | FABP7 | LDLRAP1 | NUDT19 | PLPP3 | SMPD3 |
| ACOX2 | CIDEA | FABP9 | LGMN | NUDT7 | PLPP6 | SMPD4 |
| ACOX3 | CIDEC | FADS1 | LHB | OCRL | PMVK | SP1 |
| ACOXL | CLOCK | FADS2 | LIPE | OLAH | PNPLA2 | SPHK1 |
| ACP6 | CPNE1 | FAM120B | LIPH | ORMDL1 | PNPLA3 | SPHK2 |
| ACSBG1 | CPNE3 | FAR1 | LIPI | ORMDL2 | PNPLA4 | SPNS2 |
| ACSBG2 | CPNE6 | FAR2 | LPCAT1 | ORMDL3 | PNPLA5 | SPTLC1 |
| ACSF2 | CPNE7 | FASN | LPCAT2 | OSBP | PNPLA6 | SPTLC2 |
| ACSF3 | CPT1A | FDFT1 | LPCAT3 | OSBPL10 | PNPLA7 | SPTLC3 |
| ACSL1 | CPT1B | FDPS | LPCAT4 | OSBPL1A | PNPLA8 | SPTSSA |
| ACSL3 | CPT2 | FDX1 | LPGAT1 | OSBPL2 | POMC | SPTSSB |
| ACSL4 | CPTP | FDX2 | LPIN1 | OSBPL3 | PON1 | SQLE |
| ACSL5 | CRAT | FDXR | LPIN2 | OSBPL5 | PON2 | SRD5A1 |
| ACSL6 | CREBBP | FHL2 | LPIN3 | OSBPL6 | PON3 | SRD5A2 |
| ACSM3 | CRLS1 | FIG4 | LRP2 | OSBPL7 | PPARA | SRD5A3 |
| ACSM6 | CROT | FITM1 | LSS | OSBPL8 | PPARD | SREBF1 |
| ACSS3 | CSNK1G2 | FITM2 | LTA4H | OSBPL9 | PPARG | SREBF2 |
| AGK | CSNK2A1 | G0S2 | LTC4S | OXCT1 | PPARGC1A | STAR |
| AGMO | CSNK2A2 | GALC | MAPKAPK2 | OXCT2 | PPARGC1B | STARD10 |
| AGPAT1 | CSNK2B | GBA | MBOAT1 | PCCA | PPM1L | STARD3 |
| AGPAT2 | CTSA | GBA2 | MBOAT2 | PCCB | PPP1CA | STARD3NL |
| AGPAT3 | CUBN | GC | MBOAT7 | PCTP | PPP1CB | STARD4 |
| AGPAT4 | CYP11A1 | GDE1 | MBTPS1 | PCYT1A | PPP1CC | STARD5 |
| AGPAT5 | CYP11B1 | GDPD1 | MBTPS2 | PCYT1B | PPT1 | STARD6 |
| AGPS | CYP11B2 | GDPD3 | MCAT | PCYT2 | PPT2 | STARD7 |
| AGT | CYP17A1 | GDPD5 | MCEE | PECR | PRKAA2 | STS |
| AHR | CYP19A1 | GGPS1 | ME1 | PEMT | PRKAB2 | SULT2A1 |
| AKR1B1 | CYP1A1 | GGT1 | MECR | PEX11A | PRKACA | SUMF1 |
| AKR1B15 | CYP1A2 | GGT5 | MED1 | PGS1 | PRKACB | SUMF2 |
| AKR1C1 | CYP1B1 | GK | MED10 | PHOSPHO1 | PRKACG | SUMO2 |
| AKR1C2 | CYP21A2 | GK2 | MED11 | PHYH | PRKAG2 | SYNJ1 |
| AKR1C3 | CYP24A1 | GK3P | MED12 | PI4K2A | PRKD1 | SYNJ2 |
| AKR1C4 | CYP27A1 | GLA | MED13 | PI4K2B | PRKD2 | TAFAZZIN |
| AKR1D1 | CYP27B1 | GLB1 | MED13L | PI4KA | PRKD3 | TBL1X |
| ALAS1 | CYP2C19 | GLB1L | MED14 | PI4KB | PRXL2B | TBL1XR1 |
| ALB | CYP2C8 | GLIPR1 | MED15 | PIAS4 | PSAP | TBXAS1 |
| ALDH3A2 | CYP2C9 | GLTP | MED16 | PIK3C2A | PTDSS1 | TECR |
| ALDH3B1 | CYP2D6 | GM2A | MED17 | PIK3C2B | PTDSS2 | TECRL |
| ALDH3B2 | CYP2E1 | GNPAT | MED18 | PIK3C2G | PTEN | TGS1 |
| ALOX12 | CYP2J2 | GPAM | MED19 | PIK3C3 | PTGDS | THEM4 |
| ALOX12B | CYP2R1 | GPAT2 | MED20 | PIK3CA | PTGES | THEM5 |
| ALOX15 | CYP2U1 | GPAT3 | MED21 | PIK3CB | PTGES2 | THRAP3 |
| ALOX15B | CYP39A1 | GPAT4 | MED22 | PIK3CD | PTGES3 | THRSP |
| ALOX5 | CYP3A4 | GPCPD1 | MED23 | PIK3CG | PTGIS | TIAM2 |
| ALOX5AP | CYP46A1 | GPD1 | MED24 | PIK3R1 | PTGR1 | TM7SF2 |
| ALOXE3 | CYP4A11 | GPD1L | MED25 | PIK3R2 | PTGR2 | TMEM86B |
| ALPI | CYP4A22 | GPD2 | MED26 | PIK3R3 | PTGS1 | TNFAIP8 |
| AMACR | CYP4B1 | GPS2 | MED27 | PIK3R4 | PTGS2 | TNFAIP8L1 |
| ANGPTL4 | CYP4F11 | GPX1 | MED28 | PIK3R5 | PTPMT1 | TNFAIP8L2 |
| ANKRD1 | CYP4F2 | GPX2 | MED29 | PIK3R6 | PTPN13 | TNFAIP8L3 |
| APOA1 | CYP4F22 | GPX4 | MED30 | PIKFYVE | RAB14 | TNFRSF21 |
| APOA2 | CYP4F3 | GRHL1 | MED31 | PIP4K2A | RAB4A | TPTE |
| APOA5 | CYP4F8 | GSTM4 | MED4 | PIP4K2B | RAB5A | TPTE2 |
| ARF1 | CYP51A1 | HACD1 | MED6 | PIP4K2C | RAN | TRIB3 |
| ARF3 | CYP7A1 | HACD2 | MED7 | PIP4P1 | RGL1 | TSPO |
| ARNT | CYP7B1 | HACD3 | MED8 | PIP5K1A | RORA | TSPOAP1 |
| ARNT2 | CYP8B1 | HACD4 | MED9 | PIP5K1B | RUFY1 | TXNRD1 |
| ARNTL | DBI | HACL1 | MFSD2A | PIP5K1C | RXRA | UBE2I |
| ARSA | DDHD1 | HADH | MGLL | PISD | RXRB | UGCG |
| ARSB | DDHD2 | HADHA | MID1IP1 | PITPNB | SACM1L | UGT1A9 |
| ARSD | DECR1 | HADHB | MIGA1 | PITPNM1 | SAMD8 | UGT8 |
| ARSF | DECR2 | HAO2 | MIGA2 | PITPNM2 | SAR1B | VAC14 |
| ARSG | DEGS1 | HDAC3 | MLYCD | PITPNM3 | SBF1 | VAPA |
| ARSH | DEGS2 | HELZ2 | MMAA | PLA1A | SBF2 | VAPB |
| ARSI | DGAT1 | HEXA | MMUT | PLA2G10 | SC5D | VDR |
